# Supplementary material for: Genomic analysis of head and neck cancer cases from two high incidence regions
Source: PubMed Central journal article supplement (PMC5788352; doi:10.1371/journal.pone.0191701), 2018-01-29

**S1 Fig. Mutation calling validation.** (A) Venn diagram of number of *TP53* mutations detected in the Gencapo Series. Example: *TP53*Asn239Asp mutation previously detected by Sanger sequencing (B) Plots of mutational calling showing an example of independent libraries sequenced from the same case

(A)

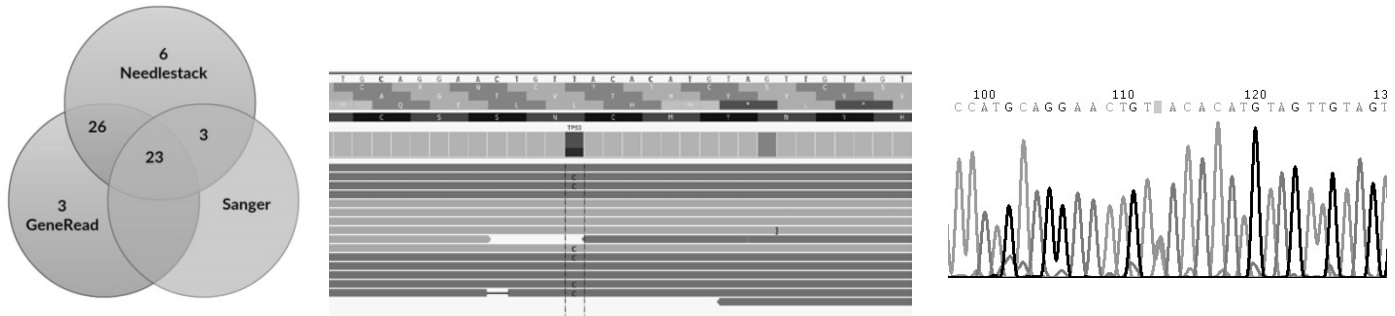

*TP53* g.7577566T>C p.Asn239Asp

(B) *PTEN*:g.89692790G>T p.Asp92Tyr

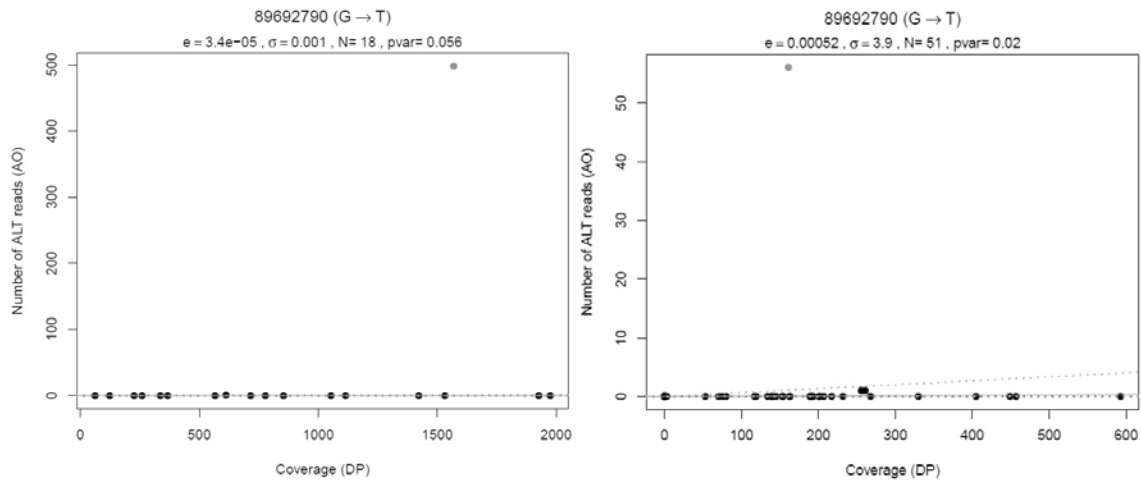

Supplement: pone.0191701.s001.pdf [file pone.0191701.s001.pdf]
