# Supplementary material for: Genomic analysis of head and neck cancer cases from two high incidence regions
Source: PubMed Central journal article supplement (PMC5788352; doi:10.1371/journal.pone.0191701), 2018-01-29
Supplement: pone.0191701.s002.pdf [file pone.0191701.s002.pdf]

**S2 Fig. (A)** Mutually exclusive alterations between the 14 genes sequenced (Significance p-value of mutual exclusivity derived from the Z-score) (B) Co-occurrence of alterations (Significance p-value of co-occurrence derived from the Z-Score). Z score based on deviation of the observed mutations compared to expected, obtained by permuting events.

(A)

|        | TP53     | NOTCH1 | CDKN2A | CASP8 | HRAS  | PTEN  | MLL2 | PIK3CA   | TP63  | FAT1 | RB1  | IRF6 | NSD1 | FBXW7 |
|--------|----------|--------|--------|-------|-------|-------|------|----------|-------|------|------|------|------|-------|
| TP53   |          |        |        |       |       |       |      |          |       |      |      |      |      |       |
| NOTCH1 | 0,063    |        |        |       |       |       |      |          |       |      |      |      |      |       |
| CDKN2A | 0,21     | 0,0097 |        |       |       |       |      |          |       |      |      |      |      |       |
| CASP8  | 0,46     | 0,59   | 0,77   |       |       |       |      |          |       |      |      |      |      |       |
| HRAS   | 0,0087   | 1      | 0,21   | 0,39  |       |       |      |          |       |      |      |      |      |       |
| PTEN   | 0,94     | 0,078  | 0,83   | 0,51  | 0,26  |       |      |          |       |      |      |      |      |       |
| MLL2   | 0,0082   | 0,12   | 0,69   | 0,86  | 0,67  | 0,076 |      |          |       |      |      |      |      |       |
| PIK3CA | 2,80E-06 | 0,029  | 0,29   | 0,39  | 0,53  | 0,044 | 0,74 |          |       |      |      |      |      |       |
| TP63   | 0,0063   | 0,003  | 0,019  | 0,37  | 0,018 | 0,076 | 0,2  | 1,00E+00 |       |      |      |      |      |       |
| FAT1   | 0,15     | 0,26   | 0,26   | 0,21  | 0,6   | 0,04  | 0,94 | 0,25     | 0,013 |      |      |      |      |       |
| RB1    | 0,019    | 0,044  | 0,55   | 0,28  | 0,78  | 0,7   | 0,96 | 0,63     | 0,12  | 0,64 |      |      |      |       |
| IRF6   | 0,0058   | 0,44   | 0,72   | 0,45  | 0,82  | 0,84  | 0,98 | 0,96     | 0,049 | 0,91 | 0,95 |      |      |       |
| NSD1   | 0,23     | 0,72   | 0,21   | 0,48  | 0,45  | 0,12  | 0,56 | 0,036    | 0,085 | 0,12 | 0,22 | 0,76 |      |       |
| FBXW7  | 0,51     | 0,23   | 0,43   | 0,17  | 0,3   | 0,16  | 0,84 | 0,45     | 0,22  | 0,59 | 0,71 | 0,99 | 0,96 |       |
|        | TP53     | NOTCH1 | CDKN2A | CASP8 | HRAS  | PTEN  | MLL2 | PIK3CA   | TP63  | FAT1 | RB1  | IRF6 | NSD1 | FBXW7 |

(B)

|        | TP53  | NOTCH1   | CDKN2A | CASP8 | HRAS | PTEN | MLL2  | PIK3CA   | TP63 | FAT1  | RB1   | IRF6  | NSD1  | FBXW7 |
|--------|-------|----------|--------|-------|------|------|-------|----------|------|-------|-------|-------|-------|-------|
| TP53   |       |          |        |       |      |      |       |          |      |       |       |       |       |       |
| NOTCH1 | 0,94  |          |        |       |      |      |       |          |      |       |       |       |       |       |
| CDKN2A | 0,79  | 0,99     |        |       |      |      |       |          |      |       |       |       |       |       |
| CASP8  | 0,54  | 0,41     | 0,23   |       |      |      |       |          |      |       |       |       |       |       |
| HRAS   | 0,99  | 3,20E-05 | 0,79   | 0,61  |      |      |       |          |      |       |       |       |       |       |
| PTEN   | 0,059 | 0,92     | 0,17   | 0,49  | 0,74 |      |       |          |      |       |       |       |       |       |
| MLL2   | 0,99  | 0,88     | 0,31   | 0,14  | 0,33 | 0,92 |       |          |      |       |       |       |       |       |
| PIK3CA | 1     | 0,97     | 0,71   | 0,61  | 0,47 | 0,96 | 0,26  |          |      |       |       |       |       |       |
| TP63   | 0,99  | 1        | 0,98   | 0,63  | 0,98 | 0,92 | 8     | 1,50E-12 |      |       |       |       |       |       |
| FAT1   | 0,85  | 0,74     | 0,74   | 0,79  | 0,4  | 0,96 | 0,059 | 0,75     | 0,99 |       |       |       |       |       |
| RB1    | 0,98  | 0,96     | 0,45   | 0,72  | 0,22 | 0,3  | 0,042 | 0,37     | 0,88 | 0,36  |       |       |       |       |
| IRF6   | 0,99  | 0,56     | 0,28   | 0,55  | 0,18 | 0,16 | 0,024 | 0,041    | 0,95 | 0,089 | 0,052 |       |       |       |
| NSD1   | 0,77  | 0,28     | 0,79   | 0,52  | 0,55 | 0,88 | 0,44  | 0,96     | 0,21 | 0,88  | 0,78  | 0,24  |       |       |
| FBXW7  | 0,49  | 0,77     | 0,57   | 0,83  | 0,7  | 0,84 | 0,16  | 0,55     | 0,78 | 0,41  | 0,29  | 0,012 | 0,039 |       |
|        | TP53  | NOTCH1   | CDKN2A | CASP8 | HRAS | PTEN | MLL2  | PIK3CA   | TP63 | FAT1  | RB1   | IRF6  | NSD1  | FBXW7 |
